# Supplementary material
Source: publisher figshare collection journal article supplement (https://acs.figshare.com/ndownloader/files/5181544)
Supplement: Supplementary file 1 [file 5181544]

## SUPPORTING INFORMATION:

### Synthesis of Dendritic Polyaniline Nanofibers in a Surfactant Gel

**Guicun Li\*<sup>†</sup> and Zhikun Zhang**

*Key Laboratory of Nanostructured Materials, Qingdao University of Science and Technology, Qingdao 266042, P. R. China.*

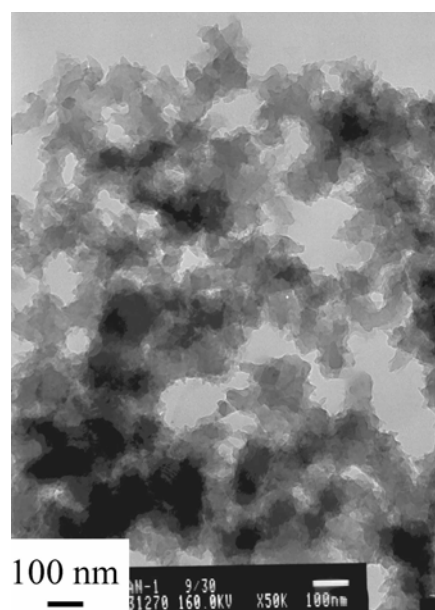

**Figure S1.** TEM image of aggregated polyaniline nanoparticles synthesized with 0.05 mol/L C<sub>16</sub>TMA at -7 °C in acetic acid.

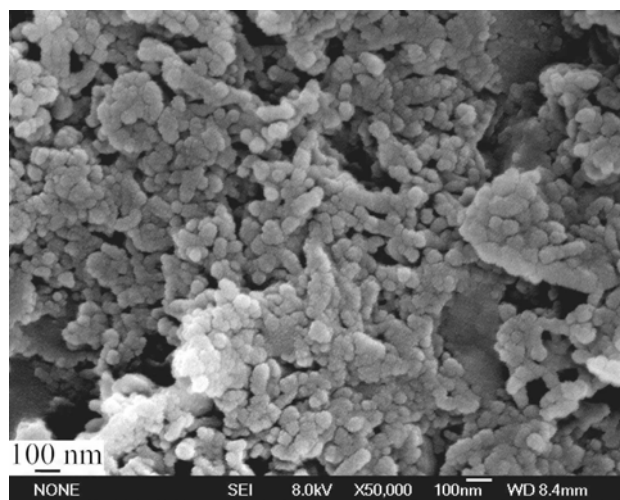

**Figure S2.** SEM image of aggregated polyaniline nanoparticles synthesized with 0.3 mol/L C<sub>16</sub>TMA at room temperature in acetic acid.
